# Supplementary material for: Trends in the Prescribing of Buprenorphine for Opioid Use Disorder, 2019-2023
Source: PubMed Central journal article supplement — Mayo Clin Proc Innov Qual Outcomes. 2024 May 24;8(3):308–20. doi: 10.1016/j.mayocpiqo.2024.04.004 (PMC11152959; doi:10.1016/j.mayocpiqo.2024.04.004), 2024-05-24
Supplement: mmc1.pdf [file mmc1.pdf]

## ONLINE SUPPLEMENTAL MATERIALS

### Technical Appendix

We used generalized estimating equations (GEE) with a log link and a Poisson distribution to implement the Poisson regression models. We used a first-order autoregressive correlation structure AR(1). This correlation structure assumes that observations have the highest correlation with the observations closest in time. The outcome was the count of fills in a given month and we used the natural log of the population with AUD or OUD as the offset term. There was one observation per month for a total of 54 observations in the model.

The specific model we used appears below:

$$f(x) = \beta_0 + \beta_1 \text{COVID19} + \beta_3 \text{TRAINING} + \beta_4 \text{XWAIVER} + \beta_5 \text{MONTH} + \beta_6 \text{TIME} + \varepsilon$$

We included indicator variables for whether the month was on after the time point in question: COVID ( $\geq$ March 2020), TRAINING ( $\geq$ May 2021), XWAIVER ( $\geq$ January 2023). These indicators measure shifts in the level of the rate over time and correspond to the results in Table 1. We also included 11 indicator variables for calendar month (MONTH) to account for differences in the rate for particular months. Finally, we included a time trends (TIME) as a continuous variable ranging from 1 to 54 for the 54 months from January 2019-June 2023.

Supplemental Figure 1: Sample Flow Diagram

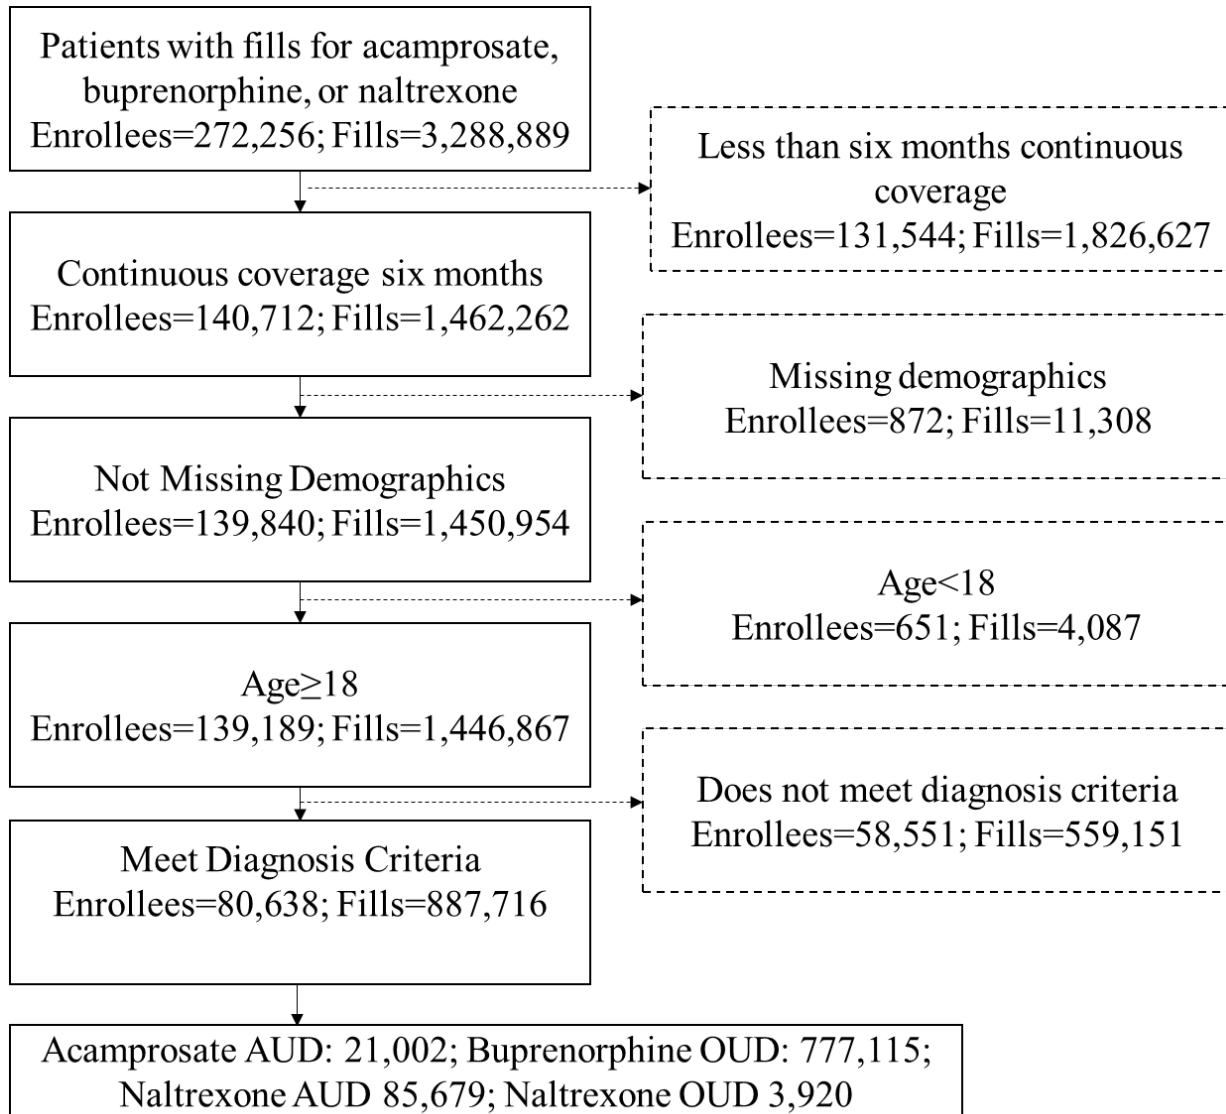

AUD: alcohol use disorder; OUD: opioid use disorder.

Supplemental Table 1: Descriptive Statistics for All Fills

| Variable                    | Level                                           | Commercial    |            |            |            | MA                                              |            |            |            |       |       |
|-----------------------------|-------------------------------------------------|---------------|------------|------------|------------|-------------------------------------------------|------------|------------|------------|-------|-------|
|                             |                                                 | Acamp.<br>AUD | BUP<br>OUD | NTX<br>OUD | NTX<br>AUD | Acamp.<br>AUD                                   | BUP<br>OUD | NTX<br>OUD | NTX<br>AUD |       |       |
| Sex                         | Female                                          | 42.5%         | 33.3%      | 41.2%      | 43.8%      | Female                                          | 43.1%      | 47.6%      | 56.9%      | 43.0% |       |
|                             | Male                                            | 57.5%         | 66.7%      | 58.8%      | 56.2%      | Male                                            | 56.9%      | 52.4%      | 43.1%      | 57.0% |       |
| Age                         | 18-25                                           | 5.0%          | 5.4%       | 35.0%      | 7.1%       | 18-39                                           | 4.0%       | 5.4%       | 12.9%      | 2.4%  |       |
|                             | 26-39                                           | 26.5%         | 41.8%      | 37.6%      | 29.5%      | 40-64                                           | 44.1%      | 64.4%      | 62.6%      | 42.2% |       |
|                             | 40-64                                           | 65.6%         | 51.4%      | 27.0%      | 60.9%      | 65-70                                           | 26.8%      | 19.0%      | 15.0%      | 27.5% |       |
|                             | 65+                                             | 70-75         | 2.9%       | 1.4%       | 0.3%       | 2.5%                                            | 70-75      | 16.8%      | 8.2%       | 4.5%  | 17.6% |
|                             |                                                 | 75-80         |            |            |            |                                                 | 75-80      | 5.5%       | 2.3%       | 3.5%  | 7.3%  |
|                             |                                                 | 80+           |            |            |            |                                                 | 80+        | 2.9%       | 0.8%       | 1.5%  | 3.0%  |
| Race and<br>Ethnicity       | Non-Hispanic                                    |               |            |            |            | Non-Hispanic                                    |            |            |            |       |       |
|                             | Asian/Pacific Islander                          | 0.9%          | 0.6%       | 1.1%       | 1.3%       | Asian/Pacific Islander                          | 1.1%       | 0.3%       | 0.1%       | 0.7%  |       |
|                             | Non-Hispanic Black                              | 3.2%          | 4.3%       | 4.6%       | 3.9%       | Non-Hispanic Black                              | 8.2%       | 8.4%       | 12.7%      | 8.6%  |       |
|                             | Hispanic                                        | 5.4%          | 4.9%       | 5.6%       | 5.4%       | Hispanic                                        | 6.5%       | 4.5%       | 7.8%       | 6.0%  |       |
|                             | Non-Hispanic White                              | 74.9%         | 70.5%      | 68.0%      | 73.1%      | Non-Hispanic White                              | 66.3%      | 67.3%      | 55.2%      | 67.7% |       |
| Unknown                     | 15.6%                                           | 19.7%         | 20.7%      | 16.4%      | Unknown    | 18.0%                                           | 19.5%      | 24.2%      | 17.0%      |       |       |
| Days Supply                 | 1-7 Days                                        | 3.1%          | 13.9%      | 7.6%       | 2.2%       | 1-7 Days                                        | 6.6%       | 19.7%      | 7.7%       | 3.1%  |       |
|                             | 8-15 Days                                       | 8.1%          | 15.9%      | 6.7%       | 3.3%       | 8-15 Days                                       | 10.0%      | 18.3%      | 8.8%       | 4.7%  |       |
|                             | 16-27 Days                                      | 1.5%          | 5.9%       | 1.2%       | 0.9%       | 16-27 Days                                      | 1.6%       | 4.6%       | 1.6%       | 0.9   |       |
|                             | 28+ Days                                        | 87.4%         | 64.2%      | 84.5%      | 93.6%      | 28+ Days                                        | 81.9%      | 57.3%      | 81.9%      | 91.4% |       |
| Elixhauser<br>Comorbidities | Alcohol Use Disorder                            | 100%          | 8.0%       | 0%         | 100%       | Alcohol Use Disorder                            | 100%       | 9.9%       | 0%         | 100%  |       |
|                             | Opioid Use Disorder                             | 9.7%          | 100%       | 100%       | 0%         | Opioid Use Disorder                             | 12.7%      | 100%       | 100%       | 0%    |       |
| Other<br>Comorbidities      | Serious Mental Illness                          | 76.3%         | 36.4%      | 69.7%      | 74.4%      | Serious Mental Illness                          | 75.5%      | 53.0%      | 85.5%      | 74.8% |       |
|                             | Psychotic Disorders                             | 1.2%          | 0.6%       | 2.4%       | 1.6%       | Psychotic Disorders                             | 9.7%       | 4.0%       | 20.2%      | 11.4% |       |
|                             | Bipolar Disorders                               | 10.9%         | 4.6%       | 15.7%      | 11.2%      | Bipolar Disorders                               | 21.7%      | 12.0%      | 38.7%      | 19.9% |       |
|                             | Other Mood Disorders/<br>Dissociative Disorders | 4.0%          | 1.2%       | 2.9%       | 3.1%       | Other Mood Disorders/<br>Dissociative Disorders | 3.7%       | 1.7%       | 5.4%       | 3.1%  |       |
|                             | Depressive Disorders                            | 55.0%         | 18.4%      | 48.2%      | 51.2%      | Depressive Disorders                            | 51.7%      | 27.8%      | 47.7%      | 49.1% |       |
|                             | Anxiety Disorders                               | 60.0%         | 26.0%      | 48.2%      | 55.8%      | Anxiety Disorders                               | 47.4%      | 34.8%      | 56.5%      | 43.8% |       |
|                             | Obsessive-Compulsive<br>Disorders               | 1.7%          | 0.5%       | 1.4%       | 1.7%       | Obsessive-Compulsive<br>Disorders               | 1.4%       | 0.6%       | 0.9%       | 1.5%  |       |
|                             | Trauma-Related<br>Disorders                     | 13.6%         | 4.8%       | 15.4%      | 11.9%      | Trauma-Related<br>Disorders                     | 16.1%      | 9.5%       | 28.3%      | 14.5% |       |
|                             | Personality Disorders                           | 2.3%          | 0.5%       | 3.7%       | 2.4%       | Personality Disorders                           | 4.6%       | 1.7%       | 10.5%      | 4.3%  |       |

AUD: alcohol use disorder; BUP: buprenorphine; MA: Medicare Advantage; NTX: naltrexone; OUD: opioid use disorder.

Supplemental Table 2: Descriptive Statistics for New Fills

| Variable                    | Level                                           | Commercial    |            |            |            | MA                                              |            |            |            |       |       |
|-----------------------------|-------------------------------------------------|---------------|------------|------------|------------|-------------------------------------------------|------------|------------|------------|-------|-------|
|                             |                                                 | Acamp.<br>AUD | BUP<br>OUD | NTX<br>OUD | NTX<br>AUD | Acamp.<br>AUD                                   | BUP<br>OUD | NTX<br>OUD | NTX<br>AUD |       |       |
| Sex                         | Female                                          | 41.3%         | 34.6%      | 35.8%      | 40.5%      | Female                                          | 43.6%      | 48.8%      | 53.2%      | 41.7% |       |
|                             | Male                                            | 58.7%         | 65.4%      | 64.2%      | 59.5%      | Male                                            | 56.4%      | 51.2%      | 46.8%      | 58.3% |       |
| Age                         | 18-25                                           | 6.3%          | 20.2%      | 37.1%      | 8.7%       | 18-39                                           | 3.2%       | 5.7%       | 13.0%      | 2.5%  |       |
|                             | 26-39                                           | 29.4%         | 41.1%      | 39.3%      | 31.6%      | 40-64                                           | 46.7%      | 59.7%      | 56.5%      | 38.8% |       |
|                             | 40-64                                           | 62.0%         | 37.7%      | 23.1%      | 57.8%      | 65-70                                           | 27.1%      | 19.2%      | 17.5%      | 30.4% |       |
|                             | 65+                                             | 70-75         | 2.3%       | 1.0%       | 0.5%       | 1.9%                                            | 70-75      | 15.9%      | 9.8%       | 8.5%  | 18.7% |
|                             |                                                 | 75-80         |            |            |            |                                                 | 75-80      | 5.2%       | 3.7%       | 2.4%  | 6.9%  |
|                             |                                                 | 80+           |            |            |            |                                                 | 80+        | 1.9%       | 1.8%       | 2.0%  | 2.6%  |
| Race and<br>Ethnicity       | Non-Hispanic                                    |               |            |            |            | Non-Hispanic                                    |            |            |            |       |       |
|                             | Asian/Pacific Islander                          | 1.1%          | 0.9%       | 1.0%       | 1.4%       | Asian/Pacific Islander                          | 0.5%       | 0.4%       | 0.4%       | 0.6%  |       |
|                             | Non-Hispanic Black                              | 4.6%          | 5.2%       | 4.6%       | 4.6%       | Non-Hispanic Black                              | 7.9%       | 12.5%      | 13.2%      | 10.3% |       |
|                             | Hispanic                                        | 6.2%          | 6.5%       | 5.8%       | 6.3%       | Hispanic                                        | 7.3%       | 5.3%       | 5.2%       | 5.9%  |       |
|                             | Non-Hispanic White                              | 71.7%         | 65.9%      | 68.1%      | 70.6%      | Non-Hispanic White                              | 68.1%      | 62.4%      | 58.4%      | 66.3% |       |
| Unknown                     | 16.4%                                           | 21.4%         | 20.5%      | 17.0%      | Unknown    | 16.2%                                           | 19.4%      | 22.8%      | 16.9%      |       |       |
| Days Supply                 | 1-7 Days                                        | 5.3%          | 38.4%      | 4.7%       | 12.1%      | 1-7 Days                                        | 6.6%       | 43.6%      | 3.6%       | 12.6% |       |
|                             | 8-15 Days                                       | 12.5%         | 25.0%      | 6.2%       | 8.6%       | 8-15 Days                                       | 15.4%      | 27.2%      | 7.9%       | 11.2% |       |
|                             | 16-27 Days                                      | 1.7%          | 4.7%       | 1.5%       | 1.6%       | 16-27 Days                                      | 1.9%       | 3.6%       | 1.2%       | 2.2%  |       |
|                             | 28+ Days                                        | 80.5%         | 32.0%      | 87.7%      | 77.7%      | 28+ Days                                        | 76.1%      | 25.6%      | 87.3%      | 74.0% |       |
| Elixhauser<br>Comorbidities | Alcohol Use Disorder                            | 100%          | 18.1%      | 0%         | 100%       | Alcohol Use Disorder                            | 100%       | 15.0%      | 0%         | 100%  |       |
|                             | Opioid Use Disorder                             | 9.4%          | 100%       | 100%       | 0%         | Opioid Use Disorder                             | 14.2%      | 100%       | 100%       | 0%    |       |
| Other<br>Comorbidities      | Serious Mental Illness                          | 72.7%         | 45.9%      | 63.0%      | 68.7%      | Serious Mental Illness                          | 72.0%      | 59.2%      | 77.6%      | 69.7% |       |
|                             | Psychotic Disorders                             | 1.6%          | 1.6%       | 2.2%       | 1.8%       | Psychotic Disorders                             | 6.6%       | 6.9%       | 14.8%      | 7.7%  |       |
|                             | Bipolar Disorders                               | 9.6%          | 7.6%       | 12.8%      | 9.2%       | Bipolar Disorders                               | 19.8%      | 16.1%      | 25.2%      | 16.8% |       |
|                             | Other Mood Disorders/<br>Dissociative Disorders | 3.6%          | 2.2%       | 2.6%       | 2.8%       | Other Mood Disorders/<br>Dissociative Disorders | 3.3%       | 2.9%       | 3.2%       | 3.0%  |       |
|                             | Depressive Disorders                            | 51.3%         | 27.9%      | 42.9%      | 47.1%      | Depressive Disorders                            | 52.3%      | 36.8%      | 46.0%      | 48.7% |       |
|                             | Anxiety Disorders                               | 55.9%         | 34.0%      | 45.1%      | 51.4%      | Anxiety Disorders                               | 48.6%      | 39.2%      | 49.6%      | 42.2% |       |
|                             | Obsessive-Compulsive<br>Disorders               | 1.6%          | 0.7%       | 1.6%       | 1.4%       | Obsessive-Compulsive<br>Disorders               | 1.4%       | 0.7%       | 2.0%       | 1.4%  |       |
|                             | Trauma-Related<br>Disorders                     | 11.2%         | 8.4%       | 13.3%      | 10.1%      | Trauma-Related<br>Disorders                     | 15.8%      | 10.9%      | 20.4%      | 12.2% |       |
|                             | Personality Disorders                           | 1.9%          | 1.4%       | 3.4%       | 2.2%       | Personality Disorders                           | 3.8%       | 2.6%       | 6.8%       | 3.3%  |       |

AUD: alcohol use disorder; BUP: buprenorphine; MA: Medicare Advantage; NTX: naltrexone; OUD: opioid use disorder.

Supplemental Table 3: Three-Month Moving Rate Ratio of Fills by Insurance, February 2019-May 2023

|        | Acamp.<br>AUD     | Commercial<br>BUP<br>OUD | NTX<br>OUD        | NTX<br>AUD        | Acamp.<br>AUD     | MA<br>BUP<br>OUD  | NTX<br>AUD        |
|--------|-------------------|--------------------------|-------------------|-------------------|-------------------|-------------------|-------------------|
| Jan-19 |                   |                          |                   |                   |                   |                   |                   |
| Feb-19 | 1                 | 1                        | 1                 | 1                 | 1                 | 1                 | 1                 |
| Mar-19 | 1.04 (0.9, 1.21)  | 1.01 (0.98, 1.04)        | 1.11 (0.84, 1.46) | 1 (0.93, 1.07)    | 1.04 (0.89, 1.21) | 1.02 (0.99, 1.05) | 1.03 (0.94, 1.13) |
| Apr-19 | 1.04 (0.9, 1.21)  | 1.01 (0.97, 1.04)        | 0.95 (0.72, 1.26) | 1 (0.94, 1.08)    | 0.97 (0.83, 1.14) | 1.02 (0.99, 1.05) | 0.96 (0.88, 1.05) |
| May-19 | 1 (0.86, 1.15)    | 0.99 (0.96, 1.02)        | 0.91 (0.69, 1.22) | 0.98 (0.91, 1.05) | 0.95 (0.81, 1.11) | 1.01 (0.98, 1.04) | 1.04 (0.95, 1.14) |
| Jun-19 | 1.01 (0.87, 1.17) | 1.02 (0.99, 1.05)        | 0.95 (0.71, 1.26) | 1 (0.93, 1.07)    | 0.92 (0.78, 1.08) | 1 (0.97, 1.03)    | 0.99 (0.91, 1.09) |
| Jul-19 | 0.96 (0.82, 1.11) | 1.02 (0.99, 1.06)        | 0.94 (0.7, 1.26)  | 0.98 (0.91, 1.05) | 1.02 (0.87, 1.2)  | 0.98 (0.95, 1.01) | 1.01 (0.92, 1.11) |
| Aug-19 | 1.01 (0.87, 1.17) | 1.04 (1.01, 1.07)        | 0.94 (0.7, 1.27)  | 1 (0.93, 1.07)    | 0.96 (0.82, 1.13) | 0.99 (0.96, 1.02) | 0.97 (0.89, 1.06) |
| Sep-19 | 0.99 (0.85, 1.15) | 1.02 (0.99, 1.05)        | 0.93 (0.69, 1.27) | 1 (0.94, 1.08)    | 0.99 (0.84, 1.16) | 1 (0.97, 1.03)    | 0.98 (0.89, 1.07) |
| Oct-19 | 1.01 (0.87, 1.18) | 1 (0.97, 1.03)           | 0.96 (0.71, 1.31) | 0.99 (0.92, 1.07) | 1.02 (0.87, 1.19) | 0.99 (0.96, 1.02) | 0.98 (0.9, 1.08)  |
| Nov-19 | 0.98 (0.85, 1.14) | 0.97 (0.94, 1)           | 0.94 (0.68, 1.28) | 0.99 (0.92, 1.06) | 1.1 (0.94, 1.28)  | 1.01 (0.98, 1.04) | 0.98 (0.89, 1.07) |
| Dec-19 | 0.98 (0.84, 1.14) | 0.98 (0.95, 1.02)        | 0.87 (0.62, 1.2)  | 0.98 (0.91, 1.05) | 1 (0.85, 1.17)    | 0.99 (0.96, 1.02) | 0.98 (0.89, 1.08) |
| Jan-20 | 0.99 (0.85, 1.15) | 1 (0.97, 1.03)           | 1 (0.72, 1.39)    | 1.02 (0.95, 1.09) | 0.94 (0.8, 1.1)   | 1.02 (0.99, 1.05) | 0.98 (0.89, 1.07) |
| Feb-20 | 1.04 (0.9, 1.21)  | 1.05 (1.02, 1.08)        | 1.03 (0.74, 1.42) | 1.04 (0.97, 1.12) | 1 (0.85, 1.17)    | 1.01 (0.98, 1.04) | 1.03 (0.93, 1.13) |
| Mar-20 | 1.01 (0.87, 1.17) | 1 (0.97, 1.04)           | 1.18 (0.86, 1.61) | 1.01 (0.94, 1.08) | 1.04 (0.89, 1.22) | 1 (0.97, 1.03)    | 1.01 (0.92, 1.1)  |
| Apr-20 | 0.96 (0.83, 1.11) | 0.99 (0.96, 1.02)        | 1.01 (0.74, 1.38) | 1 (0.94, 1.08)    | 1.05 (0.9, 1.23)  | 0.98 (0.95, 1.01) | 0.99 (0.9, 1.09)  |
| May-20 | 0.99 (0.85, 1.15) | 1 (0.97, 1.04)           | 1.02 (0.75, 1.38) | 1 (0.93, 1.07)    | 0.99 (0.84, 1.15) | 1 (0.97, 1.03)    | 1 (0.91, 1.1)     |
| Jun-20 | 1.01 (0.87, 1.18) | 1 (0.97, 1.03)           | 0.97 (0.71, 1.32) | 0.98 (0.91, 1.05) | 1.02 (0.88, 1.2)  | 1.01 (0.98, 1.04) | 1.03 (0.94, 1.13) |
| Jul-20 | 1.04 (0.89, 1.2)  | 1 (0.97, 1.03)           | 0.97 (0.71, 1.33) | 0.97 (0.9, 1.04)  | 1.02 (0.87, 1.19) | 1 (0.97, 1.03)    | 1.05 (0.96, 1.16) |
| Aug-20 | 0.95 (0.82, 1.11) | 0.99 (0.96, 1.03)        | 1.06 (0.78, 1.44) | 0.98 (0.91, 1.05) | 1.03 (0.88, 1.2)  | 0.99 (0.96, 1.02) | 1 (0.91, 1.1)     |
| Sep-20 | 0.99 (0.85, 1.15) | 0.99 (0.96, 1.02)        | 1.08 (0.8, 1.46)  | 1.01 (0.94, 1.08) | 1.01 (0.86, 1.17) | 0.99 (0.96, 1.02) | 0.99 (0.9, 1.08)  |
| Oct-20 | 0.98 (0.84, 1.14) | 1 (0.97, 1.03)           | 1.05 (0.78, 1.42) | 1 (0.93, 1.08)    | 0.97 (0.83, 1.13) | 1.01 (0.98, 1.04) | 0.96 (0.88, 1.06) |
| Nov-20 | 1.01 (0.87, 1.17) | 1 (0.97, 1.03)           | 0.94 (0.69, 1.27) | 1.01 (0.94, 1.08) | 0.97 (0.83, 1.13) | 1.02 (0.99, 1.05) | 1.01 (0.92, 1.11) |
| Dec-20 | 0.95 (0.82, 1.11) | 0.97 (0.94, 1)           | 0.87 (0.64, 1.19) | 0.98 (0.91, 1.05) | 0.94 (0.8, 1.1)   | 0.98 (0.95, 1.01) | 0.98 (0.89, 1.07) |
| Jan-21 | 0.96 (0.82, 1.12) | 1 (0.97, 1.03)           | 0.91 (0.66, 1.26) | 1.02 (0.95, 1.09) | 0.98 (0.84, 1.15) | 1.01 (0.98, 1.04) | 1.01 (0.92, 1.11) |
| Feb-21 | 1.02 (0.87, 1.19) | 1 (0.97, 1.03)           | 0.97 (0.7, 1.34)  | 1.02 (0.95, 1.1)  | 0.97 (0.82, 1.13) | 1 (0.97, 1.03)    | 1.01 (0.92, 1.11) |
| Mar-21 | 1.06 (0.91, 1.23) | 1.01 (0.98, 1.05)        | 1 (0.72, 1.39)    | 1.04 (0.97, 1.11) | 1 (0.85, 1.18)    | 1.01 (0.98, 1.04) | 1.03 (0.94, 1.13) |
| Apr-21 | 1.01 (0.87, 1.17) | 0.99 (0.96, 1.02)        | 0.93 (0.66, 1.3)  | 0.99 (0.92, 1.06) | 0.96 (0.82, 1.13) | 0.97 (0.94, 1)    | 1 (0.91, 1.1)     |
| May-21 | 1 (0.86, 1.16)    | 1 (0.97, 1.03)           | 0.98 (0.7, 1.38)  | 1 (0.93, 1.07)    | 0.99 (0.84, 1.17) | 1 (0.97, 1.03)    | 0.99 (0.9, 1.09)  |
| Jun-21 | 0.98 (0.84, 1.14) | 1 (0.97, 1.03)           | 0.89 (0.63, 1.27) | 1 (0.93, 1.07)    | 0.97 (0.82, 1.14) | 1.01 (0.98, 1.04) | 1.01 (0.92, 1.11) |
| Jul-21 | 0.99 (0.85, 1.15) | 1 (0.97, 1.03)           | 0.99 (0.7, 1.4)   | 1 (0.93, 1.07)    | 1.08 (0.92, 1.27) | 1.02 (0.99, 1.05) | 1 (0.91, 1.09)    |
| Aug-21 | 1.02 (0.87, 1.18) | 0.99 (0.96, 1.02)        | 1.03 (0.73, 1.46) | 0.99 (0.92, 1.06) | 1.04 (0.88, 1.21) | 1 (0.97, 1.03)    | 1 (0.91, 1.09)    |
| Sep-21 | 1 (0.86, 1.16)    | 0.98 (0.95, 1.01)        | 1.18 (0.85, 1.63) | 0.98 (0.91, 1.05) | 0.95 (0.81, 1.12) | 0.98 (0.96, 1.01) | 0.98 (0.9, 1.08)  |
| Oct-21 | 1.03 (0.89, 1.2)  | 1.01 (0.98, 1.04)        | 1.05 (0.76, 1.45) | 1.02 (0.95, 1.09) | 0.99 (0.84, 1.16) | 1.01 (0.98, 1.04) | 1.02 (0.93, 1.12) |
| Nov-21 | 0.94 (0.81, 1.1)  | 0.98 (0.95, 1.01)        | 0.91 (0.65, 1.27) | 0.98 (0.91, 1.05) | 1.01 (0.86, 1.19) | 0.99 (0.96, 1.02) | 1 (0.91, 1.09)    |
| Dec-21 | 0.97 (0.83, 1.13) | 0.99 (0.96, 1.02)        | 1.01 (0.73, 1.41) | 0.99 (0.92, 1.07) | 1.06 (0.91, 1.24) | 1 (0.97, 1.03)    | 1.02 (0.93, 1.12) |

|        |                   |                   |                   |                   |                   |                   |                   |
|--------|-------------------|-------------------|-------------------|-------------------|-------------------|-------------------|-------------------|
| Jan-22 | 1 (0.86, 1.17)    | 0.98 (0.95, 1.01) | 1 (0.71, 1.39)    | 0.96 (0.9, 1.04)  | 0.97 (0.83, 1.14) | 1 (0.97, 1.03)    | 1.02 (0.93, 1.11) |
| Feb-22 | 1.01 (0.87, 1.18) | 1.02 (0.98, 1.05) | 1.17 (0.85, 1.61) | 1.02 (0.95, 1.09) | 0.95 (0.81, 1.11) | 1.02 (0.99, 1.05) | 1.05 (0.96, 1.15) |
| Mar-22 | 1.04 (0.89, 1.21) | 1.01 (0.97, 1.04) | 0.9 (0.65, 1.25)  | 1.01 (0.94, 1.09) | 0.99 (0.85, 1.17) | 1.02 (0.99, 1.05) | 1 (0.92, 1.1)     |
| Apr-22 | 0.97 (0.83, 1.13) | 1 (0.97, 1.03)    | 1.03 (0.74, 1.43) | 1.04 (0.96, 1.11) | 1.03 (0.88, 1.21) | 1 (0.97, 1.03)    | 1 (0.92, 1.1)     |
| May-22 | 1 (0.86, 1.17)    | 1 (0.97, 1.03)    | 0.85 (0.6, 1.2)   | 1 (0.93, 1.07)    | 1.01 (0.86, 1.18) | 0.99 (0.96, 1.02) | 0.98 (0.9, 1.07)  |
| Jun-22 | 0.95 (0.81, 1.11) | 0.99 (0.96, 1.02) | 0.95 (0.67, 1.35) | 1 (0.94, 1.08)    | 0.98 (0.84, 1.15) | 0.98 (0.95, 1.01) | 1 (0.91, 1.09)    |
| Jul-22 | 1 (0.86, 1.17)    | 1.01 (0.98, 1.04) | 1.01 (0.71, 1.43) | 1 (0.94, 1.08)    | 1.03 (0.88, 1.21) | 1 (0.97, 1.03)    | 1.04 (0.95, 1.14) |
| Aug-22 | 1.02 (0.87, 1.19) | 0.99 (0.96, 1.02) | 0.96 (0.68, 1.37) | 0.99 (0.92, 1.07) | 1.01 (0.86, 1.18) | 0.98 (0.95, 1.01) | 0.99 (0.91, 1.09) |
| Sep-22 | 1.05 (0.9, 1.22)  | 1 (0.97, 1.03)    | 0.92 (0.64, 1.32) | 1.04 (0.97, 1.12) | 1.07 (0.92, 1.25) | 0.99 (0.96, 1.02) | 1.01 (0.93, 1.11) |
| Oct-22 | 1.01 (0.87, 1.18) | 0.99 (0.96, 1.02) | 0.97 (0.67, 1.4)  | 1.01 (0.94, 1.08) | 1.01 (0.86, 1.17) | 0.99 (0.96, 1.02) | 0.98 (0.9, 1.08)  |
| Nov-22 | 1.01 (0.87, 1.17) | 0.98 (0.95, 1.02) | 1.01 (0.7, 1.46)  | 1.01 (0.94, 1.08) | 0.98 (0.84, 1.14) | 0.99 (0.96, 1.02) | 1.01 (0.92, 1.1)  |
| Dec-22 | 0.99 (0.85, 1.16) | 1 (0.97, 1.03)    | 1.08 (0.75, 1.54) | 0.98 (0.91, 1.05) | 0.96 (0.82, 1.12) | 1.01 (0.98, 1.04) | 1.01 (0.92, 1.1)  |
| Jan-23 | 1 (0.86, 1.16)    | 0.99 (0.96, 1.02) | 0.88 (0.6, 1.27)  | 0.99 (0.92, 1.06) | 0.97 (0.83, 1.14) | 1 (0.97, 1.03)    | 0.98 (0.9, 1.07)  |
| Feb-23 | 1.01 (0.86, 1.17) | 1.02 (0.99, 1.05) | 1.01 (0.7, 1.47)  | 1.03 (0.96, 1.1)  | 1.02 (0.87, 1.2)  | 1.03 (1, 1.06)    | 1.06 (0.97, 1.16) |
| Mar-23 | 1 (0.86, 1.16)    | 0.99 (0.96, 1.02) | 1.01 (0.69, 1.46) | 1 (0.93, 1.07)    | 1.05 (0.89, 1.22) | 1 (0.97, 1.03)    | 1 (0.92, 1.1)     |
| Apr-23 | 1 (0.86, 1.17)    | 1.01 (0.98, 1.04) | 1.09 (0.76, 1.56) | 1.03 (0.96, 1.1)  | 1.05 (0.9, 1.22)  | 1.02 (0.99, 1.05) | 1.02 (0.94, 1.12) |
| May-23 | 0.98 (0.84, 1.14) | 1 (0.97, 1.03)    | 1.05 (0.74, 1.5)  | 0.99 (0.93, 1.07) | 1.08 (0.93, 1.26) | 1 (0.97, 1.03)    | 0.98 (0.89, 1.07) |

Note: The three-month moving average rate ratio is calculated with respect to January-March 2019. AUD: alcohol use disorder; BUP: buprenorphine; MA: Medicare Advantage; NTX: naltrexone; OUD: opioid use disorder.

Supplemental Table 4: Three-Month Moving Rate Ratio of Fills by Insurance and Days Supply, February 2019-May 2023

|        | Buprenorphine Commercial |                   |                   |                   | Buprenorphine MA  |                   |                   |                   |
|--------|--------------------------|-------------------|-------------------|-------------------|-------------------|-------------------|-------------------|-------------------|
|        | 1-7                      | 8-15              | 16-27             | 28+               | 1-7               | 8-15              | 16-27             | 28+               |
| Jan-19 |                          |                   |                   |                   |                   |                   |                   |                   |
| Feb-19 | 1                        | 1                 | 1                 | 1                 | 1                 | 1                 | 1                 |                   |
| Mar-19 | 1.03 (0.98, 1.08)        | 0.99 (0.94, 1.04) | 1.03 (0.95, 1.12) | 1.01 (0.99, 1.04) | 1.02 (0.96, 1.08) | 0.99 (0.93, 1.05) | 1 (0.88, 1.12)    | 1.03 (0.99, 1.06) |
| Apr-19 | 1.03 (0.98, 1.08)        | 0.98 (0.93, 1.03) | 1.05 (0.97, 1.14) | 1.02 (1, 1.05)    | 1.06 (1, 1.12)    | 0.99 (0.93, 1.05) | 1.08 (0.96, 1.21) | 1.04 (1.01, 1.08) |
| May-19 | 0.99 (0.94, 1.05)        | 0.95 (0.91, 1)    | 1.07 (0.99, 1.16) | 1.01 (0.99, 1.04) | 1.11 (1.04, 1.17) | 1 (0.95, 1.06)    | 1.08 (0.96, 1.21) | 1.04 (1.01, 1.07) |
| Jun-19 | 1.03 (0.98, 1.08)        | 1.01 (0.96, 1.06) | 1.09 (1.01, 1.17) | 1.02 (1, 1.05)    | 1.12 (1.06, 1.19) | 1.02 (0.97, 1.08) | 1.09 (0.97, 1.22) | 1.03 (1, 1.06)    |
| Jul-19 | 1.1 (1.05, 1.15)         | 1.07 (1.02, 1.12) | 1.11 (1.03, 1.19) | 1.03 (1, 1.05)    | 1.11 (1.05, 1.17) | 1.03 (0.97, 1.09) | 1.03 (0.92, 1.15) | 1 (0.97, 1.04)    |
| Aug-19 | 1.2 (1.14, 1.26)         | 1.13 (1.08, 1.19) | 1.09 (1.01, 1.18) | 1.05 (1.03, 1.08) | 1.1 (1.04, 1.16)  | 1.03 (0.97, 1.08) | 0.99 (0.88, 1.11) | 1 (0.97, 1.03)    |
| Sep-19 | 1.27 (1.21, 1.33)        | 1.16 (1.11, 1.21) | 1.11 (1.03, 1.2)  | 1.06 (1.04, 1.09) | 1.14 (1.08, 1.2)  | 1.03 (0.97, 1.08) | 1.02 (0.91, 1.14) | 0.99 (0.96, 1.02) |
| Oct-19 | 1.3 (1.24, 1.37)         | 1.13 (1.08, 1.19) | 1.15 (1.07, 1.24) | 1.05 (1.02, 1.07) | 1.12 (1.06, 1.18) | 1.01 (0.95, 1.06) | 1.05 (0.94, 1.17) | 0.98 (0.94, 1.01) |
| Nov-19 | 1.27 (1.21, 1.33)        | 1.09 (1.04, 1.14) | 1.19 (1.1, 1.28)  | 1.01 (0.99, 1.04) | 1.1 (1.05, 1.17)  | 0.98 (0.93, 1.04) | 1.17 (1.05, 1.31) | 0.99 (0.96, 1.02) |
| Dec-19 | 1.24 (1.18, 1.3)         | 1.07 (1.03, 1.13) | 1.2 (1.12, 1.29)  | 0.99 (0.97, 1.02) | 1.09 (1.03, 1.15) | 0.96 (0.91, 1.02) | 1.14 (1.02, 1.27) | 0.99 (0.96, 1.02) |
| Jan-20 | 1.2 (1.14, 1.26)         | 1.08 (1.03, 1.13) | 1.17 (1.08, 1.26) | 1 (0.97, 1.02)    | 1.14 (1.08, 1.2)  | 0.96 (0.91, 1.02) | 1.09 (0.98, 1.22) | 1 (0.97, 1.04)    |
| Feb-20 | 1.19 (1.13, 1.25)        | 1.15 (1.1, 1.2)   | 1.15 (1.06, 1.24) | 1.07 (1.04, 1.09) | 1.16 (1.1, 1.23)  | 1 (0.95, 1.06)    | 0.97 (0.86, 1.08) | 1.02 (0.99, 1.05) |
| Mar-20 | 1.1 (1.05, 1.16)         | 1.16 (1.1, 1.21)  | 1.09 (1.01, 1.18) | 1.1 (1.07, 1.12)  | 1.08 (1.02, 1.14) | 1.01 (0.96, 1.07) | 0.93 (0.83, 1.04) | 1.05 (1.02, 1.08) |
| Apr-20 | 1.02 (0.96, 1.07)        | 1.18 (1.12, 1.24) | 1.02 (0.95, 1.11) | 1.1 (1.08, 1.13)  | 0.97 (0.92, 1.02) | 1 (0.94, 1.05)    | 0.91 (0.81, 1.02) | 1.05 (1.02, 1.09) |
| May-20 | 1.02 (0.97, 1.07)        | 1.2 (1.15, 1.26)  | 1.01 (0.93, 1.09) | 1.1 (1.08, 1.13)  | 0.93 (0.88, 0.99) | 0.99 (0.93, 1.04) | 0.95 (0.84, 1.06) | 1.06 (1.03, 1.1)  |
| Jun-20 | 1.06 (1.01, 1.12)        | 1.2 (1.14, 1.25)  | 0.99 (0.92, 1.07) | 1.09 (1.07, 1.12) | 0.98 (0.93, 1.04) | 0.99 (0.94, 1.04) | 0.97 (0.87, 1.09) | 1.05 (1.02, 1.08) |
| Jul-20 | 1.12 (1.07, 1.18)        | 1.18 (1.12, 1.23) | 1.03 (0.95, 1.11) | 1.08 (1.05, 1.1)  | 0.99 (0.94, 1.05) | 1.01 (0.96, 1.07) | 1.01 (0.9, 1.12)  | 1.03 (1, 1.07)    |
| Aug-20 | 1.14 (1.09, 1.2)         | 1.16 (1.11, 1.22) | 1.03 (0.95, 1.11) | 1.07 (1.04, 1.09) | 0.99 (0.94, 1.05) | 1.03 (0.98, 1.09) | 1.02 (0.91, 1.13) | 1.01 (0.98, 1.05) |
| Sep-20 | 1.14 (1.08, 1.19)        | 1.16 (1.11, 1.21) | 1.04 (0.97, 1.13) | 1.05 (1.03, 1.08) | 1 (0.95, 1.05)    | 1.02 (0.97, 1.08) | 1 (0.9, 1.11)     | 1 (0.97, 1.03)    |
| Oct-20 | 1.12 (1.06, 1.18)        | 1.13 (1.08, 1.19) | 1.06 (0.98, 1.14) | 1.06 (1.04, 1.09) | 1.03 (0.98, 1.09) | 1.02 (0.97, 1.08) | 1.03 (0.93, 1.15) | 1 (0.97, 1.03)    |
| Nov-20 | 1.08 (1.03, 1.13)        | 1.13 (1.08, 1.18) | 1.07 (0.99, 1.16) | 1.07 (1.04, 1.09) | 1.07 (1.02, 1.13) | 1.02 (0.97, 1.07) | 1.05 (0.94, 1.16) | 1.01 (0.98, 1.04) |
| Dec-20 | 1.01 (0.96, 1.06)        | 1.09 (1.04, 1.15) | 1.02 (0.94, 1.1)  | 1.05 (1.03, 1.08) | 1.05 (1, 1.11)    | 0.98 (0.93, 1.04) | 1.02 (0.92, 1.14) | 0.99 (0.96, 1.02) |
| Jan-21 | 1.02 (0.97, 1.07)        | 1.1 (1.05, 1.15)  | 1 (0.92, 1.08)    | 1.05 (1.03, 1.08) | 1.1 (1.05, 1.16)  | 0.98 (0.93, 1.03) | 0.98 (0.88, 1.09) | 1.01 (0.98, 1.04) |
| Feb-21 | 1.02 (0.97, 1.07)        | 1.09 (1.04, 1.15) | 0.93 (0.86, 1.01) | 1.05 (1.03, 1.08) | 1.11 (1.06, 1.17) | 0.97 (0.92, 1.02) | 0.95 (0.85, 1.06) | 1 (0.97, 1.03)    |
| Mar-21 | 1.06 (1.01, 1.12)        | 1.1 (1.05, 1.15)  | 0.94 (0.86, 1.01) | 1.07 (1.04, 1.09) | 1.12 (1.07, 1.18) | 0.97 (0.92, 1.03) | 0.95 (0.85, 1.05) | 1.02 (0.99, 1.05) |
| Apr-21 | 1.04 (0.99, 1.1)         | 1.07 (1.02, 1.13) | 0.92 (0.85, 0.99) | 1.06 (1.03, 1.08) | 1.06 (1.01, 1.12) | 0.94 (0.89, 0.99) | 0.94 (0.85, 1.05) | 1 (0.97, 1.03)    |
| May-21 | 1.06 (1.01, 1.11)        | 1.06 (1.01, 1.11) | 0.94 (0.87, 1.02) | 1.06 (1.03, 1.08) | 1.05 (0.99, 1.1)  | 0.95 (0.9, 1)     | 0.97 (0.87, 1.08) | 0.99 (0.96, 1.02) |
| Jun-21 | 1.05 (1, 1.11)           | 1.05 (1, 1.1)     | 0.98 (0.91, 1.06) | 1.06 (1.03, 1.08) | 1.07 (1.02, 1.13) | 0.95 (0.91, 1)    | 1.01 (0.91, 1.12) | 0.99 (0.96, 1.02) |
| Jul-21 | 1.03 (0.98, 1.08)        | 1.06 (1.01, 1.11) | 0.99 (0.92, 1.07) | 1.06 (1.03, 1.08) | 1.11 (1.06, 1.17) | 0.98 (0.93, 1.03) | 1.03 (0.93, 1.14) | 1 (0.97, 1.03)    |
| Aug-21 | 1.01 (0.96, 1.06)        | 1.02 (0.97, 1.06) | 1 (0.92, 1.08)    | 1.05 (1.03, 1.08) | 1.14 (1.08, 1.2)  | 0.99 (0.94, 1.04) | 1.02 (0.93, 1.13) | 0.99 (0.96, 1.02) |
| Sep-21 | 1 (0.95, 1.05)           | 0.97 (0.93, 1.02) | 0.97 (0.9, 1.05)  | 1.04 (1.01, 1.06) | 1.13 (1.08, 1.19) | 0.97 (0.92, 1.01) | 1.04 (0.94, 1.15) | 0.97 (0.94, 1)    |
| Oct-21 | 1 (0.95, 1.05)           | 0.97 (0.92, 1.02) | 0.95 (0.88, 1.03) | 1.06 (1.03, 1.08) | 1.16 (1.1, 1.22)  | 0.97 (0.92, 1.02) | 1.02 (0.92, 1.12) | 0.98 (0.95, 1.01) |
| Nov-21 | 0.95 (0.91, 1)           | 0.94 (0.9, 0.99)  | 0.91 (0.84, 0.98) | 1.04 (1.01, 1.06) | 1.13 (1.08, 1.19) | 0.95 (0.9, 1)     | 1.01 (0.91, 1.12) | 0.98 (0.95, 1)    |
| Dec-21 | 0.94 (0.89, 0.99)        | 0.94 (0.9, 0.99)  | 0.89 (0.82, 0.97) | 1.03 (1.01, 1.06) | 1.12 (1.07, 1.18) | 0.97 (0.92, 1.02) | 0.96 (0.87, 1.06) | 0.97 (0.95, 1)    |
| Jan-22 | 0.91 (0.86, 0.96)        | 0.91 (0.87, 0.96) | 0.87 (0.8, 0.95)  | 1.02 (0.99, 1.04) | 1.12 (1.07, 1.18) | 0.97 (0.92, 1.02) | 0.93 (0.84, 1.03) | 0.97 (0.94, 1)    |
| Feb-22 | 0.93 (0.88, 0.98)        | 0.94 (0.89, 0.98) | 0.89 (0.82, 0.97) | 1.03 (1.01, 1.06) | 1.15 (1.1, 1.21)  | 0.98 (0.94, 1.03) | 0.87 (0.79, 0.97) | 0.99 (0.96, 1.02) |
| Mar-22 | 0.93 (0.88, 0.98)        | 0.94 (0.89, 0.99) | 0.85 (0.78, 0.93) | 1.04 (1.02, 1.07) | 1.2 (1.14, 1.26)  | 0.98 (0.93, 1.03) | 0.9 (0.81, 1)     | 1 (0.97, 1.03)    |
| Apr-22 | 0.91 (0.86, 0.96)        | 0.94 (0.89, 0.99) | 0.88 (0.81, 0.95) | 1.04 (1.02, 1.07) | 1.18 (1.13, 1.24) | 0.98 (0.94, 1.03) | 0.96 (0.86, 1.06) | 1 (0.97, 1.03)    |

|        |                   |                   |                   |                   |                   |                   |                   |                   |
|--------|-------------------|-------------------|-------------------|-------------------|-------------------|-------------------|-------------------|-------------------|
| May-22 | 0.91 (0.86, 0.96) | 0.92 (0.87, 0.96) | 0.89 (0.82, 0.97) | 1.04 (1.02, 1.07) | 1.15 (1.1, 1.21)  | 0.97 (0.92, 1.02) | 1.04 (0.94, 1.15) | 0.99 (0.97, 1.02) |
| Jun-22 | 0.88 (0.83, 0.93) | 0.91 (0.86, 0.96) | 0.93 (0.85, 1)    | 1.03 (1.01, 1.06) | 1.12 (1.06, 1.17) | 0.96 (0.91, 1.01) | 1.05 (0.95, 1.16) | 0.97 (0.95, 1)    |
| Jul-22 | 0.9 (0.85, 0.95)  | 0.95 (0.9, 1)     | 0.93 (0.85, 1)    | 1.03 (1.01, 1.06) | 1.09 (1.04, 1.15) | 0.97 (0.92, 1.01) | 1.09 (0.99, 1.2)  | 0.97 (0.95, 1)    |
| Aug-22 | 0.87 (0.82, 0.91) | 0.96 (0.92, 1.01) | 0.91 (0.84, 0.98) | 1.03 (1, 1.05)    | 1.07 (1.02, 1.12) | 0.94 (0.9, 0.99)  | 1.06 (0.96, 1.17) | 0.96 (0.93, 0.99) |
| Sep-22 | 0.82 (0.78, 0.87) | 0.97 (0.92, 1.01) | 0.91 (0.84, 0.99) | 1.03 (1.01, 1.06) | 1 (0.96, 1.06)    | 0.93 (0.89, 0.98) | 1.08 (0.98, 1.19) | 0.96 (0.93, 0.98) |
| Oct-22 | 0.74 (0.7, 0.78)  | 0.94 (0.89, 0.98) | 0.9 (0.83, 0.98)  | 1.04 (1.01, 1.06) | 0.96 (0.92, 1.01) | 0.92 (0.88, 0.97) | 1.06 (0.96, 1.17) | 0.96 (0.93, 0.99) |
| Nov-22 | 0.7 (0.66, 0.74)  | 0.89 (0.85, 0.94) | 0.91 (0.84, 0.99) | 1.03 (1.01, 1.06) | 0.91 (0.87, 0.96) | 0.91 (0.87, 0.96) | 1.09 (0.99, 1.2)  | 0.96 (0.93, 0.99) |
| Dec-22 | 0.71 (0.67, 0.75) | 0.88 (0.84, 0.93) | 0.9 (0.83, 0.97)  | 1.04 (1.01, 1.06) | 0.94 (0.9, 0.99)  | 0.92 (0.87, 0.96) | 1.05 (0.95, 1.16) | 0.97 (0.94, 1)    |
| Jan-23 | 0.71 (0.67, 0.75) | 0.86 (0.81, 0.9)  | 0.9 (0.83, 0.98)  | 1.03 (1, 1.05)    | 0.97 (0.92, 1.02) | 0.9 (0.86, 0.95)  | 1 (0.9, 1.1)      | 0.97 (0.94, 1)    |
| Feb-23 | 0.74 (0.69, 0.78) | 0.88 (0.83, 0.92) | 0.86 (0.79, 0.94) | 1.05 (1.02, 1.08) | 1.02 (0.97, 1.08) | 0.93 (0.88, 0.97) | 0.94 (0.85, 1.04) | 1 (0.97, 1.03)    |
| Mar-23 | 0.72 (0.68, 0.76) | 0.85 (0.8, 0.89)  | 0.86 (0.79, 0.94) | 1.05 (1.02, 1.07) | 1.02 (0.97, 1.08) | 0.92 (0.88, 0.97) | 0.95 (0.85, 1.05) | 1.01 (0.98, 1.04) |
| Apr-23 | 0.73 (0.69, 0.77) | 0.85 (0.8, 0.89)  | 0.91 (0.84, 0.99) | 1.06 (1.03, 1.08) | 1.03 (0.98, 1.08) | 0.95 (0.9, 1)     | 1 (0.9, 1.1)      | 1.03 (1, 1.06)    |
| May-23 | 0.71 (0.67, 0.76) | 0.85 (0.81, 0.9)  | 0.97 (0.89, 1.05) | 1.05 (1.02, 1.08) | 1.02 (0.97, 1.07) | 0.95 (0.9, 0.99)  | 1.07 (0.97, 1.18) | 1.03 (1, 1.06)    |

Note: The three-month moving average rate ratio is calculated with respect to January-March 2019. AUD: alcohol use disorder; BUP: buprenorphine; MA: Medicare Advantage; NTX: naltrexone; OUD: opioid use disorder.



Supplemental Table 5: Distribution of Fills by Dosage, January 2019-June 2023

|        | Buprenorphine Commercial |           |            |        | Buprenorphine MA |           |            |        |
|--------|--------------------------|-----------|------------|--------|------------------|-----------|------------|--------|
|        | 0-7.9 MG                 | 8-11.9 MG | 12-15.9 MG | 16+ MG | 0-7.9 MG         | 8-11.9 MG | 12-15.9 MG | 16+ MG |
| Jan-19 | 25.4%                    | 32.7%     | 11.5%      | 30.4%  | 9.0%             | 10.4%     | 12.6%      | 68.0%  |
| Feb-19 | 25.5%                    | 33.2%     | 10.7%      | 30.6%  | 9.1%             | 11.2%     | 12.8%      | 66.9%  |
| Mar-19 | 25.6%                    | 33.0%     | 11.4%      | 29.9%  | 9.4%             | 11.8%     | 11.9%      | 66.8%  |
| Apr-19 | 26.0%                    | 32.9%     | 11.6%      | 29.5%  | 9.1%             | 12.1%     | 12.4%      | 66.4%  |
| May-19 | 26.4%                    | 32.7%     | 11.2%      | 29.7%  | 8.7%             | 11.7%     | 11.5%      | 68.1%  |
| Jun-19 | 26.1%                    | 32.6%     | 12.2%      | 29.2%  | 9.8%             | 11.3%     | 12.3%      | 66.5%  |
| Jul-19 | 25.8%                    | 31.2%     | 11.6%      | 31.5%  | 8.9%             | 10.8%     | 12.9%      | 67.5%  |
| Aug-19 | 24.5%                    | 29.9%     | 11.9%      | 33.8%  | 9.6%             | 10.7%     | 12.5%      | 67.2%  |
| Sep-19 | 24.0%                    | 28.6%     | 12.1%      | 35.3%  | 9.4%             | 11.4%     | 12.5%      | 66.7%  |
| Oct-19 | 23.5%                    | 27.6%     | 13.2%      | 35.7%  | 9.4%             | 11.4%     | 12.4%      | 66.7%  |
| Nov-19 | 23.4%                    | 27.3%     | 12.6%      | 36.6%  | 10.1%            | 10.8%     | 12.9%      | 66.2%  |
| Dec-19 | 22.9%                    | 26.6%     | 12.8%      | 37.6%  | 10.0%            | 10.6%     | 12.6%      | 66.8%  |
| Jan-20 | 22.7%                    | 26.6%     | 13.4%      | 37.3%  | 9.3%             | 10.9%     | 13.6%      | 66.2%  |
| Feb-20 | 22.1%                    | 26.6%     | 13.4%      | 37.9%  | 9.7%             | 10.7%     | 13.0%      | 66.6%  |
| Mar-20 | 22.4%                    | 26.1%     | 13.0%      | 38.5%  | 9.9%             | 10.8%     | 12.2%      | 67.1%  |
| Apr-20 | 22.3%                    | 25.6%     | 13.4%      | 38.7%  | 10.3%            | 9.9%      | 12.5%      | 67.3%  |
| May-20 | 21.9%                    | 25.3%     | 14.0%      | 38.8%  | 9.7%             | 10.3%     | 12.3%      | 67.7%  |
| Jun-20 | 21.9%                    | 24.6%     | 13.8%      | 39.7%  | 10.1%            | 9.8%      | 12.1%      | 67.9%  |
| Jul-20 | 21.5%                    | 23.9%     | 14.4%      | 40.2%  | 10.5%            | 10.2%     | 12.2%      | 67.2%  |
| Aug-20 | 21.0%                    | 23.8%     | 14.4%      | 40.8%  | 10.3%            | 9.9%      | 12.4%      | 67.5%  |
| Sep-20 | 21.8%                    | 23.1%     | 14.0%      | 41.1%  | 8.8%             | 10.0%     | 12.9%      | 68.2%  |
| Oct-20 | 21.0%                    | 22.9%     | 14.6%      | 41.5%  | 10.2%            | 9.6%      | 12.4%      | 67.8%  |
| Nov-20 | 20.7%                    | 22.6%     | 14.3%      | 42.4%  | 10.3%            | 10.1%     | 12.2%      | 67.5%  |
| Dec-20 | 19.9%                    | 22.3%     | 15.2%      | 42.6%  | 10.1%            | 9.6%      | 12.2%      | 68.2%  |
| Jan-21 | 20.3%                    | 21.8%     | 14.3%      | 43.6%  | 10.2%            | 9.9%      | 12.1%      | 67.7%  |
| Feb-21 | 20.4%                    | 21.7%     | 14.2%      | 43.7%  | 9.9%             | 10.1%     | 11.5%      | 68.5%  |
| Mar-21 | 20.5%                    | 21.6%     | 14.8%      | 43.1%  | 10.1%            | 9.9%      | 12.1%      | 67.9%  |
| Apr-21 | 19.9%                    | 21.7%     | 14.5%      | 43.9%  | 10.2%            | 9.3%      | 11.7%      | 68.9%  |
| May-21 | 19.8%                    | 21.4%     | 14.7%      | 44.1%  | 11.1%            | 9.8%      | 12.0%      | 67.1%  |
| Jun-21 | 19.6%                    | 21.2%     | 14.2%      | 45.0%  | 11.0%            | 9.8%      | 12.5%      | 66.7%  |
| Jul-21 | 19.0%                    | 21.2%     | 14.4%      | 45.5%  | 10.7%            | 9.6%      | 12.8%      | 66.9%  |
| Aug-21 | 19.0%                    | 20.5%     | 14.1%      | 46.4%  | 10.7%            | 10.0%     | 12.5%      | 66.8%  |
| Sep-21 | 18.4%                    | 20.7%     | 14.3%      | 46.6%  | 10.3%            | 9.7%      | 12.8%      | 67.2%  |
| Oct-21 | 18.6%                    | 20.6%     | 14.4%      | 46.4%  | 10.3%            | 9.8%      | 13.0%      | 66.8%  |
| Nov-21 | 18.7%                    | 19.7%     | 14.4%      | 47.2%  | 10.6%            | 9.7%      | 12.0%      | 67.7%  |
| Dec-21 | 18.8%                    | 19.8%     | 14.4%      | 47.1%  | 10.2%            | 9.9%      | 11.7%      | 68.2%  |
| Jan-22 | 19.5%                    | 20.1%     | 14.4%      | 46.0%  | 10.8%            | 10.2%     | 11.6%      | 67.5%  |
| Feb-22 | 19.4%                    | 20.0%     | 14.0%      | 46.6%  | 10.9%            | 9.8%      | 11.5%      | 67.9%  |
| Mar-22 | 19.6%                    | 19.2%     | 14.9%      | 46.3%  | 10.6%            | 9.9%      | 11.7%      | 67.7%  |
| Apr-22 | 19.2%                    | 19.5%     | 14.6%      | 46.8%  | 10.8%            | 10.2%     | 11.2%      | 67.9%  |
| May-22 | 19.3%                    | 19.7%     | 14.3%      | 46.6%  | 11.1%            | 10.1%     | 11.4%      | 67.4%  |
| Jun-22 | 19.1%                    | 20.1%     | 13.9%      | 46.8%  | 11.1%            | 10.1%     | 11.5%      | 67.3%  |
| Jul-22 | 18.7%                    | 19.5%     | 14.7%      | 47.2%  | 10.9%            | 10.2%     | 11.7%      | 67.2%  |
| Aug-22 | 18.6%                    | 19.5%     | 14.5%      | 47.3%  | 10.8%            | 10.3%     | 11.7%      | 67.1%  |
| Sep-22 | 18.6%                    | 19.1%     | 14.1%      | 48.1%  | 9.9%             | 10.3%     | 11.7%      | 68.1%  |
| Oct-22 | 18.6%                    | 19.1%     | 14.4%      | 47.8%  | 10.6%            | 9.8%      | 11.6%      | 68.0%  |
| Nov-22 | 18.1%                    | 19.4%     | 15.0%      | 47.6%  | 10.6%            | 10.0%     | 11.3%      | 68.1%  |
| Dec-22 | 18.5%                    | 19.0%     | 14.4%      | 48.1%  | 10.3%            | 9.9%      | 11.5%      | 68.2%  |
| Jan-23 | 19.2%                    | 18.5%     | 14.8%      | 47.6%  | 10.3%            | 10.0%     | 11.9%      | 67.8%  |
| Feb-23 | 19.4%                    | 18.7%     | 14.3%      | 47.6%  | 10.5%            | 10.1%     | 12.2%      | 67.2%  |

|        |       |       |       |       |       |       |       |       |
|--------|-------|-------|-------|-------|-------|-------|-------|-------|
| Mar-23 | 18.5% | 18.8% | 14.4% | 48.3% | 10.8% | 10.0% | 11.4% | 67.8% |
| Apr-23 | 18.6% | 18.3% | 14.4% | 48.8% | 11.2% | 10.1% | 11.0% | 67.8% |
| May-23 | 18.0% | 17.8% | 14.8% | 49.4% | 11.1% | 10.2% | 11.3% | 67.3% |
| Jun-23 | 17.6% | 18.1% | 14.0% | 50.3% | 11.0% | 10.0% | 11.2% | 67.8% |

MG=Milligrams.

Supplemental Table 6: Percentage of Fills by Prescriber Specialty, January 2019-June 2023

|        | Acamprosate<br>AUD |    |       |            | Buprenorphine<br>OUD |      |       |            | Naltrexone<br>OUD |    |       |            | Naltrexone<br>AUD |    |       |            |
|--------|--------------------|----|-------|------------|----------------------|------|-------|------------|-------------------|----|-------|------------|-------------------|----|-------|------------|
|        | FP                 | PM | PSY   | APN/<br>PA | FP                   | PM   | PSY   | APN/<br>PA | FP                | PM | PSY   | APN/<br>PA | FP                | PM | PSY   | APN/<br>PA |
| 2019Q1 | 15.9%              |    | 42.0% | 14.2%      | 19.1%                | 7.0% | 30.0% | 10.7%      |                   |    | 35.6% | 31.8%      | 14.5%             |    | 36.7% | 19.5%      |
| 2019Q2 | 12.9%              |    | 41.4% | 16.2%      | 17.1%                | 7.1% | 31.4% | 11.1%      |                   |    | 39.8% | 31.6%      | 15.2%             |    | 39.8% | 17.9%      |
| 2019Q3 | 11.3%              |    | 37.2% | 19.6%      | 21.9%                | 5.1% | 29.0% | 13.3%      |                   |    | 39.3% | 27.9%      | 13.1%             |    | 39.4% | 19.4%      |
| 2019Q4 | 12.8%              |    | 41.4% | 17.3%      | 17.3%                | 6.2% | 29.2% | 15.8%      |                   |    | 37.1% | 28.9%      | 14.3%             |    | 37.6% | 19.2%      |
| 2020Q1 | 12.2%              |    | 33.5% | 20.1%      | 19.3%                | 6.0% | 26.4% | 18.3%      |                   |    | 25.6% | 33.3%      | 14.9%             |    | 36.8% | 21.7%      |
| 2020Q2 | 9.8%               |    | 37.8% | 24.1%      | 18.5%                | 6.3% | 25.0% | 17.5%      |                   |    | 37.2% | 26.6%      | 15.5%             |    | 35.6% | 21.4%      |
| 2020Q3 | 14.2%              |    | 35.3% | 23.3%      | 17.4%                | 6.8% | 26.8% | 17.5%      |                   |    | 31.6% | 32.6%      | 12.7%             |    | 35.2% | 22.5%      |
| 2020Q4 | 9.4%               |    | 38.8% | 25.1%      | 16.8%                | 6.3% | 28.3% | 21.8%      |                   |    | 32.6% | 35.9%      | 13.6%             |    | 32.9% | 24.3%      |
| 2021Q1 | 11.8%              |    | 34.6% | 22.1%      | 14.6%                | 4.0% | 26.6% | 24.1%      |                   |    | 30.7% | 31.7%      | 12.8%             |    | 32.0% | 24.7%      |
| 2021Q2 | 10.5%              |    | 38.2% | 13.0%      | 13.9%                | 5.3% | 26.2% | 24.3%      |                   |    | 25.0% | 38.5%      | 12.3%             |    | 26.7% | 24.7%      |
| 2021Q3 | 12.6%              |    | 32.4% | 22.5%      | 15.0%                | 4.9% | 22.9% | 26.7%      |                   |    | 30.0% | 42.5%      | 13.2%             |    | 29.2% | 28.3%      |
| 2021Q4 | 13.5%              |    | 28.8% | 22.3%      | 12.6%                | 7.8% | 22.6% | 24.6%      |                   |    | 18.7% | 35.2%      | 14.0%             |    | 28.4% | 27.0%      |
| 2022Q1 | 8.2%               |    | 31.6% | 23.7%      | 15.0%                | 6.1% | 18.5% | 25.1%      |                   |    | 21.0% | 34.6%      | 15.8%             |    | 28.8% | 24.2%      |
| 2022Q2 | 10.0%              |    | 34.8% | 20.9%      | 11.7%                | 6.2% | 19.3% | 28.3%      |                   |    | 20.4% | 35.2%      | 14.5%             |    | 28.2% | 27.3%      |
| 2022Q3 | 12.6%              |    | 28.5% | 23.9%      | 13.2%                | 5.4% | 20.6% | 27.1%      |                   |    | 18.4% | 35.5%      | 14.6%             |    | 25.7% | 27.7%      |
| 2022Q4 | 12.6%              |    | 27.1% | 26.0%      | 11.9%                | 6.2% | 19.9% | 30.1%      |                   |    | 19.7% | 40.9%      | 13.5%             |    | 26.8% | 29.9%      |
| 2023Q1 | 13.2%              |    | 21.6% | 27.0%      | 15.2%                | 5.7% | 15.5% | 30.5%      |                   |    | 27.3% | 28.8%      | 14.5%             |    | 23.0% | 30.0%      |
| 2023Q2 | 13.2%              |    | 23.9% | 27.9%      | 12.6%                | 7.3% | 17.2% | 31.8%      |                   |    | 21.8% | 29.1%      | 16.1%             |    | 22.5% | 28.9%      |

Note: APN/PA stands for advanced practice nurses and physician assistants, FP stands for family practice, PM stands for pain medicine, PSY stands for psychiatry.
